# Supplementary material
Source: publisher site journal article supplement (https://www.dovepress.com/article/424360)
Supplement: Supplementary file 1 [file get_supplementary_file.php]

**Supplementary data**

**Table S1** Quality evaluation for nonrandomized controlled trials (non-RCTs) and pre-post intervention studies

| **Study, year** | **Criteria** | | | | | | | | **Additional criteria in the case on comparative study** | | | | | **Total** |
| --- | --- | --- | --- | --- | --- | --- | --- | --- | --- | --- | --- | --- | --- | --- |
| **A stated aim of the study** | **Inclusion of consecutive patients** | **Prospective collection of data** | **End point appropriate to the study aim** | **Unbiased evaluation of end points** | **Follow-up period appropriate** | **Loss to follow-up not exceeding 5%** | **Prospective calculation of the study size** | **A control group having the criterion standard intervention** | **Contemporary groups** | **Baseline equivalence of groups** | **Prospective calculation of the sample size** | **statistical analyses adapted to the study design** |
| Clarke GH, 19691 | 2 | 0 | 0 | 2 | 0 | 2 | 2 | 0 | - | - | - | - | - | 8 |
| Patel S.B et al, 20022 | 2 | 0 | 0 | 2 | 0 | 2 | 2 | 0 | - | - | - | - | - | 8 |
| Imanishi H et al, 20063 | 2 | 0 | 0 | 2 | 0 | 2 | 2 | 0 | - | - | - | - | - | 8 |
| González M.C et al, 20084 | 2 | 0 | 0 | 2 | 0 | 0 | 2 | 0 | - | - | - | - | - | 6 |
| Narváez-Moreno B et al,20125 | 2 | 0 | 0 | 2 | 0 | 1 | 2 | 0 | - | - | - | - | - | 7 |
| Chiba T et al, 20146 | 2 | 0 | 0 | 2 | 0 | 2 | 2 | 0 | - | - | - | - | - | 8 |
| Benamara-Lévy M et al, 20157 | 2 | 0 | 0 | 2 | 0 | 0 | 2 | 0 | - | - | - | - | - | 6 |
| Combalia A et al, 20178 | 2 | 1 | 0 | 2 | 0 | 2 | 2 | 0 | - | - | - | - | - | 9 |
| Souz M.B et al, 20179 | 2 | 0 | 0 | 2 | 0 | 0 | 2 | 0 | - | - | - | - | - | 6 |
| Cruz E.M.N et al, 201710 | 2 | 0 | 0 | 2 | 0 | 2 | 2 | 0 | - | - | - | - | - | 8 |
| Mendes L et al, 201811 | 2 | 0 | 0 | 2 | 0 | 2 | 2 | 0 | - | - | - | - | - | 8 |
| Merdji H et al, 201812 | 2 | 0 | 0 | 2 | 0 | 1 | 2 | 0 | - | - | - | - | - | 7 |
| Meijer J.M et al, 201913 | 2 | 0 | 0 | 2 | 0 | 2 | 2 | 0 | - | - | - | - | - | 8 |
| Ackerman M et al, 202114 | 2 | 0 | 0 | 2 | 0 | 0 | 2 | 0 | - | - | - | - | - | 6 |
| Cakici O.A et al, 202115 | 2 | 0 | 0 | 2 | 0 | 1 | 2 | 0 | - | - | - | - | - | 7 |
| Koumaki D et al, 202116 | 2 | 0 | 0 | 2 | 0 | 0 | 2 | 0 | - | - | - | - | - | 6 |
| Toston N.S et al, 202117 | 2 | 0 | 0 | 2 | 0 | 0 | 2 | 0 | - | - | - | - | - | 6 |
| Hardy S et al, 202218 | 2 | 0 | 0 | 2 | 0 | 2 | 2 | 0 | - | - | - | - | - | 8 |
| McLarney R et al, 202219 | 2 | 0 | 0 | 2 | 0 | 0 | 2 | 0 | - | - | - | - | - | 6 |
| Stetkevich S. A et al, 202220 | 2 | 0 | 0 | 2 | 0 | 1 | 2 | 0 | - | - | - | - | - | 7 |
| Kranke T et al, 202221 | 2 | 0 | 0 | 2 | 0 | 1 | 2 | 0 | - | - | - | - | - | 7 |
| Toujani S et al, 202322 | 2 | 0 | 0 | 2 | 0 | 2 | 2 | 0 | - | - | - | - | - | 8 |

**Notes**: 0, not reported; 1, reported but inadequate; 2, reported and adequate

**Table S2** Clinical characteristic of patients with yellow urticaria (n=25)

| **Author** | **Study design** | **No of patients** | **Sex/age** | **Type of urticaria** | **TB/DB**  **(mg/dL)** | **Icteric sclerae** | **Possible causes/associated factors of urticaria** | **Cause of jaundice** | **Pathologic bilirubin stain** | **Treatment** | **Total duration of urticarial symptom** | **Duration of yellow pigmentation resolution** |
| --- | --- | --- | --- | --- | --- | --- | --- | --- | --- | --- | --- | --- |
| Clarke GH.1  (1969) | Letter to editor | 1 | F/NA | NA a | NA | NA | Underlying cold induced urticaria | Infectious hepatitis | NA | Steroid therapy  (Unspecified) | NA | NA | |
| Patel S.B  et al.2  (2002) | Case report | 1 | M/48y | Acute | 5.4/1.5 | NA | Idiopathic | Alcoholic cirrhosis | Negative | Fexofenadine  60 mg/12hr | 24 hr | 7 d | |
| Imanishi H et al.3  (2006) | Letter to editor | 1 | M/58y | Acute | 4.1/3.1 | NA | Sepsis | HCV cirrhosis | Negative | Oral chlorpheniramine maleate | 4 hr | NA | |
| González M.C et al.4  (2008) | Case report | 1 | M/68y | Acute | 2.8/1.8 | No | *Streptococcus agalactiae* endocarditis | Liver cirrhosis | NA | Hydroxyzine 25 mg/8hr | Rapid resolution | NA | |
| Narváez-Moreno B et al.5  (2012) | Case report | 1 | F/43y | NA a | 8.4/7.5 | Yes | Idiopathic | Metastatic cancer | Positive | Antihistamine  (Unspecified) | NA | NA | |
| Chiba T  et al.6  (2014) | Case report | 1 | M/56y | Acute | 8.1/5.2 | Yes | Drug  (Vancomycin, Ampicillin) | Alcoholic and HCV  cirrhosis | NA | NA | 12 hr | NA | |
| Benamara-Lévy M  et al.7  (2015) | Case report | 1 | F/65y | Acute | 4.8/2.7 | Yes | Drug  (Tranexamic acid) | Secondary jaundice from hemorrhagic shock | NA | Intravenous dexchlorpheniramine maleate | 12 hr | NA | |
| Combalia A et al.8  (2017) | Letter to editor | 2 | M/62y | Acute | 7.4/2.4 | Yes | Drug  (Amoxicillin/ clavulanate) | Hemochromatosis related cirrhosis | NA | Oral dexchlorpheniramine maleate 2mg/12hr | 10 d | 10 d | |
|  |  |  | M/58y | Acute | 7.5/2.8 | Yes | Drug  (Omeprazole) | Alcoholic cirrhosis | NA | Ebastine 10 mg/8hr | 2 d | 2 d | |
| Souz M.B  et al.9  (2017) | Letter to editor | 1 | F/55y | NA a | NA/NA | NA | Idiopathic | Cryptogenic cirrhosis | NA | Antihistamine  (Unspecified) | NA | NA | |
| Cruz E.M.N  et al.10  (2017) | Case  report | 1 | F/82y | Acute | 5.3/4 | Yes | Biliary pancreatitis | Biliary pancreatitis | Positive | Loratadine  10mg/12hr | 18 hr | NA | |
| Mendes L  et al.11  (2018) | Letter to editor | 1 | M/35y | Acute | 7.5/0.2 | NA | Drug  (ART) | ART induced hepatotoxicity | NA | Fexofenadine  60 mg/12hr | 1 hr | NA | |
| Merdji H  et al.12  (2018) | Case report | 1 | M/55y | Acute | 6.99/NA | NA | FFP transfusion | Alcoholic cirrhosis | NA | Antihistamine  (Unspecified) | 2 hr | 4 d | |
| Meijer J.M et al.13  (2019) | Case report | 1 | M/43y | Acute | 9.01/8.07 | Yes | Idiopathic | Autoimmune hepatitis | NA | Desloratadine 10mg/12hr | 2 d | NA | |
| Ackerman M et al.14  (2021) | Letter to editor | 2 | M/73y | Acute | 2.75/2.22 | NA | Sepsis | Angiocholitis | NA | Intravenous dexchlorpheniramine maleate | Rapid resolution | NA | |
|  |  |  | F/66y | Acute | 3.92/2.92 | NA | Idiopathic | Choledochal lithiasis | NA | Intravenous antihistamine (Unspecified) | Rapid resolution | NA | |
| Cakici O.A et al.15  (2021) | Case report | 2 | F/72y | Acute | 17.4/9.1 | NA | Drug  (Ceftriaxone) | Cryptogenic cirrhosis | NA | Bilastine 20mg/d | Rapid resolution | NA | |
|  |  |  | M/47y | Acute | 9.98/6.52 | Yes | Idiopathic | HBV induced acute hepatic failure | NA | Intravenous chlorpheniramine maleate | Few days | NA | |
| Koumaki D et al.16  (2021) | Case report | 1 | M/61y | Acute | NA/13.87 | Yes | Drug  (Piperacillin/ Tazobactam) | Alcoholic cirrhosis | NA | Intravenous chlorpheniramine maleate | 24 hr | NA | |
| Toston N.S  et al.17  (2021) | Case report | 1 | M/66y | Acute | NA/NA | NA | Idiopathic | Metastatic cancer | NA | Cetirizine | 2 hr | NA | |
| Hardy S  et al.18  (2022) | Case report | 1 | M/67y | Acute | 6.8/NA | Yes | Blood transfusion | Hepatocellular carcinoma with alcoholic cirrhosis | NA | Intravenous  diphenhydramine | 2 hr | Few days | |
| McLarney R et al.19  (2022) | Case report | 1 | M/70y | NA a | 13.3/11.6 | Yes | Iodine-based contrast media | Acetaminophen induced hepatotoxicity | NA | Antihistamine  (Unspecified) | NA | NA | |
| Stetkevich S. A et al.20  (2022) | Letter to editor | 1 | M/44y | Acute | NA/NA | Yes | EBV infection | EBV hepatitis | NA | Cetirizine 10mg/12hr | 24 hr | 3 d | |
| Kranke T  et al.21  (2022) | Case report | 1 | M/51y | Acute | 9.55/NA | Yes | Drug  (Dabrafenib, Trametinib, Cetuximab) | Metastatic cancer | NA | Antihistamine (Unspecified) | Few days | NA | |
| Toujani S  et al.22  (2023) | Case report | 1 | M/33y | NA a | 70.84/45.00 | Yes | Idiopathic | Overlap syndrome of autoimmune hepatitis and primary biliary cholangitis | NA | Prednisone  1 mg/kg/d | NA | NA | |

**Notes**: a Type of urticaria could not be defined in 5 patients due to the absence of information regarding the total duration of urticarial symptoms.

**Abbreviations**: ART, antiretroviral therapy; d, day; DB, direct bilirubin; dL, deciliter; EBV, Epstein–Barr virus; F, female; FFP, fresh frozen plasma; HBV, hepatitis B virus; HCV, hepatitis C virus; kg, kilogram; hr, hour; M, male; mg, milligram; NA, not available; TB, total bilirubin; y, years old.

**Figure S1** Cutaneous lesion of urticariaA) **Ordinary urticaria:** multiple skin-colored/erythematosus wheals surrounded by flare on the right elbow and forearm.B) **Yellow urticaria:** multiple yellowish raised hives on the right arm (reproduced with permission from Scientific Scholar Publisher 16)


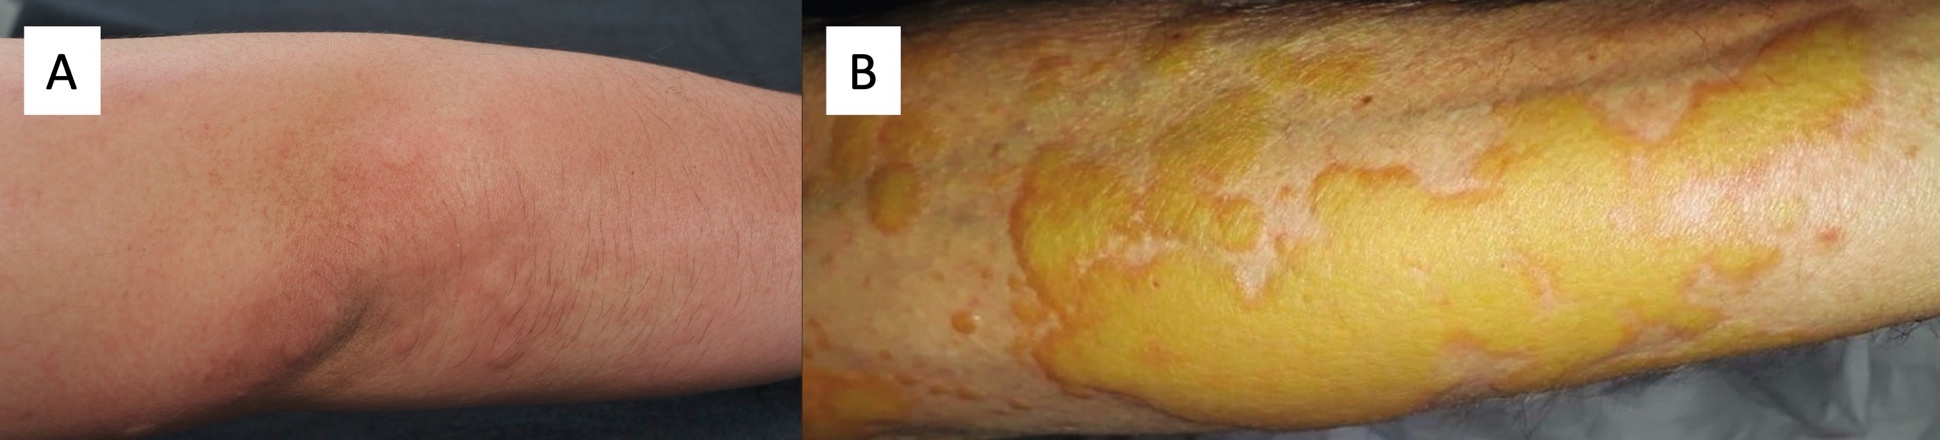


**References**

1. Clarke GH. Cold urticaria. *Arch Dermatol*. 1969;100(1):121.

2. Patel SB, Mutasim DF. Yellow urticaria secondary to hyperbilirubinemia in a patient with end-stage liver disease. *Cutis*. 2002;70(1):41-4; quiz 8.

3. Imanishi H, Tsuruta D, Kobayashi H, Ishii M. Yellow urticaria associated with hepatitis type-C liver cirrhosis. *J Dermatol.* 2006;33(11):823-4.

4. Cabanillas González M, Monteagudo Sánchez B, García Rodríguez JF, De Las Heras Sotos C. Yellow urticaria. *Med Clin*. 2008;130(17):680.

5. Narváez-Moreno B, Pereyra-Rodríguez JJ. Yellow urticaria. *N Engl J Med.* 2012;367(2):e4.

6. Chiba T, Hayashi F, Shinmura M, Kiyomatsu M, Tatematsu S, Nakao M, et al. Yellow urticaria in a patient with hepatic cirrhosis. *G Ital Dermatol Venereol*. 2014;149(3):381-2.

7. Benamara-Lévy M, Samimi M, Georgescou G, Moënne-Loccoz J, Maruani A. A case of yellow urticaria. *Presse Med*. 2015;44(1):122-3.

8. Combalia A, Fustà X, Guilabert A, Mascaró JM, Jr., Estrach T. Yellow urticaria: report of two cases and review of the literature. *J Eur Acad Dermatol Venereol*. 2017;31(4):e204-e6.

9. Boechat Souza M, Russo T, Delorenze LM, Castro G, Argenziano G, Piccolo V. Cryptogenic cirrhosis: misunderstood cause of yellow urticaria. *J Eur Acad Dermatol Venereol*. 2017;31(12):e538-e9.

10. Nava Cruz EM, Castanedo-Cázares JP, Hernández Blanco DV, Torres-Álvarez B. Yellow urticaria and biliary pancreatitis. *JAAD Case Rep*. 2017;3(5):448-50.

11. Mendes L, João GAP, Oliveira LM. Yellow urticaria in a patient on prophylactic antiretroviral therapy. *An Bras Dermatol*. 2018;93(4):618-9.

12. Merdji H, Clere-Jehl R, Monnier A, Meziani F. Yellow urticaria following plasma transfusion. *Intensive Care Med*. 2018;44(1):100-1.

13. Meijer JM, van Dalen T, van der Wal B. A Patient with Jaundice and Pruritus, Not the Usual Suspect? *Gastroenterology*. 2019;157(1):e8-e9.

14. Ackerman M, Esteve E, Potier P, Finon A. Two cases of yellow urticaria revealing acute lithiasic biliary disease. *Australas J Dermatol*. 2021;62(2):e326-e7.

15. Çakıcı ÖA, Sengün OA, Tekin SH, Salman A. Yellow Urticaria. *J Allergy Clin Immunol Pract*. 2021;9(1):479-80.

16. Koumaki D, Demetriou G, Krasagakis K. Yellow urticaria in a patient with alcohol-related liver cirrhosis and jaundice. *Indian J Dermatol Venereol Leprol*. 2021;87:676-7.

17. Segurado Tostón N, García Castro R, Román Curto C. Yellow Urticaria. *Actas Dermosifiliogr*. 2021;112 Suppl 1:19.

18. Hardy S, King R, Scholand S. Yellow Urticaria in a Patient with Liver Disease. *Case Rep Clin Pract*. 2022;11(04):101-5.

19. McLarney RM, Heymann WR. Yellow Urticaria. *JAMA Dermatol*. 2022;158(6):685.

20. Stetkevich SA, Urso B, Saeed L, Hosking A-M, Lee BA, Grando SA, et al. Yellow urticaria: a rare phenomenon. *Int J Dermatol*. 2022;62(4):e225-e6.

21. Kränke T, Kränke B. Yellow Urticaria. *Dermatol Pract Concept*. 2022;12(4):e2022225.

22. Toujani S, El Ouni A, Mestiri S, Toujani E, Belhassen A, Meddeb Z, et al. Yellow urticaria revealing overlap syndrome of autoimmune hepatitis and primary biliary cholangitis. *Clin Case Rep*. 2023;11(3):e7050.
